# Supplementary material for: Hydrogel-assisted neuroregeneration approaches towards brain injury therapy: A state-of-the-art review
Source: PubMed Central journal article supplement (PMC6232648; doi:10.1016/j.csbj.2018.10.011), 2018-11-02
Supplement: mmc1.pdf [file mmc1.pdf]

## Appendix A. Supplementary data

**Table S1.** Inherent characteristics of hyaluronic acid (HA) as a candidate for hydrogel-based brain tissue regeneration.

| Positive findings                                                                                                                                                                                                                                                                                                                                                                                                                                                                                                                                                                                                                                                                                                                                                                                                                                                                                                                                                                                                                                                                                                                                                                                                                                           | Negative findings                                                                                                                                                                                                                                                                                                                                                                                   |
|-------------------------------------------------------------------------------------------------------------------------------------------------------------------------------------------------------------------------------------------------------------------------------------------------------------------------------------------------------------------------------------------------------------------------------------------------------------------------------------------------------------------------------------------------------------------------------------------------------------------------------------------------------------------------------------------------------------------------------------------------------------------------------------------------------------------------------------------------------------------------------------------------------------------------------------------------------------------------------------------------------------------------------------------------------------------------------------------------------------------------------------------------------------------------------------------------------------------------------------------------------------|-----------------------------------------------------------------------------------------------------------------------------------------------------------------------------------------------------------------------------------------------------------------------------------------------------------------------------------------------------------------------------------------------------|
| <ul style="list-style-type: none"> <li>• natural component of the CNS (biocompatible) [23,25,41,44,46]</li> <li>• immunoneutral [32,65]</li> <li>• biodegradable [32]</li> <li>• highly porous [34,44]</li> <li>• stimulates neuronal viability and differentiation of NS/PCs, NPCs, and iPS-NPCs <i>in vitro</i> [32,41,42,49]</li> <li>• stimulates neurite outgrowth of HNPCs <i>in vitro</i> [40]</li> <li>• promotes neuronal differentiation of hiPS-NPCs <i>in vivo</i> [14,47]</li> <li>• holds anti-gliosis and anti-inflammatory effects <i>in vivo</i> [45,46]</li> <li>• supports survival and proliferation of C17.2 and ReNcell <i>in vivo</i> [65]</li> <li>• shields transplanted cells from host immune response <i>in vivo</i> [14,65]</li> <li>• HA-PLGA co-gel provides functional improvement <i>in vivo</i> [46]</li> <li>• does not influence gel stiffness in co-gels [55]</li> <li>• superior to Matrigel in terms of neurite outgrowth in SH-SY5Y cell line <i>in vitro</i> [38]</li> <li>• HA-modified alginate supports greater cell viability and neuronal differentiation of ESCs and NSCs and neurite extension when compared to unmodified alginate [78]</li> <li>• HA is a shear-thinning agent in co-gels [96]</li> </ul> | <ul style="list-style-type: none"> <li>• poor adhesiveness [32,34,36,49]</li> <li>• does not interact with integrins [23,35]</li> <li>• does not support hiPS-NPCs viability <i>in vivo</i> [14]</li> <li>• requires modifications to reduce the biodegradation rate [23,34,35,49]</li> <li>• requires another component (e.g. collagen) for stabilization [49]</li> <li>• swelling [93]</li> </ul> |

*NS/PCs – neural stem/progenitor cells – a heterogeneous cell population; NPCs – neural progenitor cells; iPS-NPCs – induced pluripotent stem cell-derived neural progenitor cells; hiPS-NPCs – human induced pluripotent stem cell-derived neural progenitor cells; C17.2 – a mouse immortalized NSC line; ReNcell – human immortalized NPC line; PLGA – poly(lactic-co-glycolic acid); SH-SY5Y – human neuroblastoma cell line; ESCs – embryonic stem cells; NSCs – neural stem cells*

**Table S2.** Inherent characteristics of collagen type I as a candidate for hydrogel-based brain tissue regeneration

| Positive findings                                                                                                                                                                                                                                                                                                                                                                                                                                                                                                                                                                                                                                                                                               | Negative findings                                                                                                                                                                                                                                                                                                                                                                                                                                                                                                                                                                                                                                                                                                       |
|-----------------------------------------------------------------------------------------------------------------------------------------------------------------------------------------------------------------------------------------------------------------------------------------------------------------------------------------------------------------------------------------------------------------------------------------------------------------------------------------------------------------------------------------------------------------------------------------------------------------------------------------------------------------------------------------------------------------|-------------------------------------------------------------------------------------------------------------------------------------------------------------------------------------------------------------------------------------------------------------------------------------------------------------------------------------------------------------------------------------------------------------------------------------------------------------------------------------------------------------------------------------------------------------------------------------------------------------------------------------------------------------------------------------------------------------------------|
| <ul style="list-style-type: none"> <li>• biocompatible [48,62–64]</li> <li>• non-toxic[64]</li> <li>• biodegradable [48]</li> <li>• non-immunogenic [21,63–65] (though negated by Itosaka <i>et al.</i> [113])</li> <li>• self-healing <i>in situ</i> [64]</li> <li>• reduces micro- and astrogliosis <i>in vivo</i> [64,66]</li> <li>• gels under physiological conditions [49]</li> <li>• supports differentiation of BMSCs towards neuronal lineage [59]</li> <li>• retains and stabilizes HA [49,63]</li> <li>• supports viability, proliferation, and differentiation of embryonic, postnatal, and adult NS/PCs when mixed with HA [49,63]</li> <li>• supports neurite outgrowth [53,58,60,157]</li> </ul> | <ul style="list-style-type: none"> <li>• does not naturally occur in mammalian brain tissue, except subventricular zone [49,61]</li> <li>• has no measurable effect on NSC’s viability [57,152]</li> <li>• decreases in volume post gelation both <i>in vitro</i> and <i>in vivo</i> [64]</li> <li>• increases stiffness in co-gels [55,59]</li> <li>• inferior to Matrigel and self-assembling peptides in terms of NSCs survival and differentiation [61]</li> <li>• inferior to Matrigel in terms of neural differentiation and neurite growth in hESCs experiments <i>in vitro</i> [107]</li> <li>• inferior to Matrigel in terms of NSCs viability, differentiation, and migration <i>in vitro</i> [61]</li> </ul> |

*BMSCs* – bone marrow-derived stem cells; *hESCs* – human embryonic stem cells

**Table S3.** Inherent characteristics of alginate as a candidate for hydrogel-based brain tissue regeneration

| <b>Positive findings</b>                                                                                                                                                                                                                                                                                                                                                                                                                                                                                                                                                                                                                                                                                                                                        | <b>Negative findings</b>                                                                                                                                                                                                                                                                                                                                                                                                                                                                                                                                                                                                 |
|-----------------------------------------------------------------------------------------------------------------------------------------------------------------------------------------------------------------------------------------------------------------------------------------------------------------------------------------------------------------------------------------------------------------------------------------------------------------------------------------------------------------------------------------------------------------------------------------------------------------------------------------------------------------------------------------------------------------------------------------------------------------|--------------------------------------------------------------------------------------------------------------------------------------------------------------------------------------------------------------------------------------------------------------------------------------------------------------------------------------------------------------------------------------------------------------------------------------------------------------------------------------------------------------------------------------------------------------------------------------------------------------------------|
| <ul style="list-style-type: none"><li>• non-toxic [68,71–73,78,91]</li><li>• biocompatible [78]</li><li>• non-inflammatory [78]</li><li>• shields NSCs from host immune response [78]</li><li>• neuro-protective [73,75]</li><li>• stimulates structural and functional maturation of NSCs, glial cells [74,75]</li><li>• supports NSCs viability and proliferation [71,74,78]</li><li>• promotes self-healing when used as a cross-linker for the chitosan-based hydrogel [91]</li><li>• chitosan-alginate co-gel supports viability and neuronal differentiation of NSCs [91]</li><li>• alginate-poly(<math>\gamma</math>-glutamic acid) ICC scaffolds are highly porous, non-cytotoxic to iPS-NPCs and promote their neuronal differentiation [76]</li></ul> | <ul style="list-style-type: none"><li>• does not naturally occur in mammalian brain tissue [67,68]</li><li>• poorly recovers after shear stress [77]</li><li>• hardly injectable [77]</li><li>• non-degradable [68]</li><li>• degradation products decrease NPCs proliferation [68]</li><li>• insufficient porosity [68,74]</li><li>• requires modifications to provide cell attachment and survival [74,78]</li><li>• supports worse NSCs spheroids proliferation and differentiation when compared to chitosan-based hydrogel [77]</li><li>• requires cross-linking to prevent diffusion <i>in vivo</i> [78]</li></ul> |

**Table S4.** Inherent characteristics of chitosan as a candidate for hydrogel-based brain tissue regeneration

| <b>Positive findings</b>                                                                                                                                                                                                                                                                                                                                                                                                                                                                                                                                                                                                                                                                                 | <b>Negative findings</b>                                                                                                                                                                                                                                                          |
|----------------------------------------------------------------------------------------------------------------------------------------------------------------------------------------------------------------------------------------------------------------------------------------------------------------------------------------------------------------------------------------------------------------------------------------------------------------------------------------------------------------------------------------------------------------------------------------------------------------------------------------------------------------------------------------------------------|-----------------------------------------------------------------------------------------------------------------------------------------------------------------------------------------------------------------------------------------------------------------------------------|
| <ul style="list-style-type: none"><li>• thermally cross-linkable [84]</li><li>• highly porous [85,86,90]</li><li>• biodegradable [85]</li><li>• non-immunogenic [83]</li><li>• non-toxic to NSCs [77,91]</li><li>• cell-adhesive for cervical ganglion neurons and embryonic cortical neurons [82,85]</li><li>• decreases stiffness in chitosan-agarose co-gel [82]</li><li>• suits for drug delivery systems [89]</li><li>• favors NSC spheroids' proliferation and differentiation [77]</li><li>• improves functional recovery in zebrafish embryos when injected with neurosphere NSCs [77]</li><li>• chitosan-alginate co-gel supports viability and neuronal differentiation of NSCs [91]</li></ul> | <ul style="list-style-type: none"><li>• long gelling time [84,89]</li><li>• can induce cationic cytotoxicity [90]</li><li>• requires modifications to support cell viability and neurite outgrowth [84,85]</li><li>• requires modifications for self-healing [77,89,91]</li></ul> |

**Table S5.** Inherent characteristics of methylcellulose- and HAMC- as candidates for hydrogel-based tissue regeneration

| Positive findings                                                                                                                                                                                                                                                                                                                                                                                                                                                                                                                                                                                                                                                                                                                                                           | Negative findings                                                                                                                                                                        |
|-----------------------------------------------------------------------------------------------------------------------------------------------------------------------------------------------------------------------------------------------------------------------------------------------------------------------------------------------------------------------------------------------------------------------------------------------------------------------------------------------------------------------------------------------------------------------------------------------------------------------------------------------------------------------------------------------------------------------------------------------------------------------------|------------------------------------------------------------------------------------------------------------------------------------------------------------------------------------------|
| <ul style="list-style-type: none"> <li>• gelling at physiological temperatures [15]</li> <li>• injectable [15,93,94,97,101,103]</li> <li>• biodegradable [103]</li> <li>• exhibit anti-inflammatory [93,97–100,103] and anti-astrogliosis effects [98–100,103]</li> <li>• non-toxic [97,103]</li> <li>• applicable to drug delivery systems [92,93,95–100]</li> <li>• support viability of NS/PCs [94]</li> <li>• improve the solubility of sparingly soluble drugs [92]</li> <li>• methylcellulose reduces swelling in co-gels [93,94,103]</li> <li>• methylcellulose is self-healing [96,103]</li> <li>• HAMC prevents cell sedimentation and aggregation [94,102]</li> <li>• HAMC promotes NSC viability and penetration into host brain <i>in vivo</i> [102]</li> </ul> | <ul style="list-style-type: none"> <li>• methylcellulose exhibits low hydrophilicity unless blended with HA or modified [92]</li> <li>• barely functionalizable backbone [96]</li> </ul> |

**Table S6.** Inherent characteristics of Matrigel as a candidate for hydrogel-based brain tissue regeneration

| Positive findings                                                                                                                                                                                                                                                                                                                                                                                                                                                                                                                                                                                                                                                                                                                                                                                                                                                                                                                                                                                                                                                                                                      | Negative findings                                                                                                                                                                                                                                                                                                                                                                                                                                                                                                                                                                                                                                                   |
|------------------------------------------------------------------------------------------------------------------------------------------------------------------------------------------------------------------------------------------------------------------------------------------------------------------------------------------------------------------------------------------------------------------------------------------------------------------------------------------------------------------------------------------------------------------------------------------------------------------------------------------------------------------------------------------------------------------------------------------------------------------------------------------------------------------------------------------------------------------------------------------------------------------------------------------------------------------------------------------------------------------------------------------------------------------------------------------------------------------------|---------------------------------------------------------------------------------------------------------------------------------------------------------------------------------------------------------------------------------------------------------------------------------------------------------------------------------------------------------------------------------------------------------------------------------------------------------------------------------------------------------------------------------------------------------------------------------------------------------------------------------------------------------------------|
| <ul style="list-style-type: none"> <li>• contains growth factors and adhesive proteins [15,20,22,26,104]</li> <li>• injectable [15]</li> <li>• porous [180]</li> <li>• physiological stiffness [106]</li> <li>• growth factor-reduced form exhibits an anti-inflammatory effect, supports ES-NPCs viability and neuronal differentiation, and promotes host cell proliferation <i>in vivo</i> [109]</li> <li>• promotes NS/PCs maturation and functionality in MCAO model [112]</li> <li>• superior to collagen I in terms of neuronal differentiation and neurite growth in hESCs experiments <i>in vitro</i> [107]</li> <li>• growth factor reduced form is superior to RADA16-I in terms of viability, migration, and maturation of ES-NPCs <i>in vitro</i> [109]</li> <li>• superior to collagen I in terms of NSCs viability, neuronal differentiation, and migration <i>in vitro</i> [61]</li> <li>• supports viability and maturation of spiral ganglion neurons <i>in vitro</i> [111]</li> <li>• applicable for modification of porous PEG scaffold to promote rat neurons' neurite outgrowth [156]</li> </ul> | <ul style="list-style-type: none"> <li>• unstandardized composition [15,66,105,109]</li> <li>• immunogenic [15]</li> <li>• solidifies at room temperature [108]</li> <li>• inferior to salmon fibrin in terms of stimulating neurite growth of cortical and spinal neurons <i>in vitro</i> [106]</li> <li>• inferior to RADA16-I in terms of NSCs survival and neuronal differentiation <i>in vitro</i> [108]</li> <li>• inferior to RADA16-I hydrogel in terms of NSCs viability <i>in vitro</i> [61]</li> <li>• inferior to HA in terms of neurite outgrowth in SH-SY5Y cell line <i>in vitro</i> [38]</li> <li>• increases stiffness in co-gels [110]</li> </ul> |

*ES-NPCs – embryonic stem cell-derived neural progenitor cells; MCAO – middle cerebral artery occlusion; RADA16-I – a 16-mer peptide consisting of four RADA (arginine, alanine, aspartate, alanine) tetramers, also known as PuraMatrix; PEG – poly(ethylene glycol)*

**Additional citation:**

[180] Balachandran NTL and HL and NMS and K. Fabrication of a matrigel–collagen semi-interpenetrating scaffold for use in dynamic valve interstitial cell culture. *Biomed Mater* 2017;12:45013.

**Table S7.** Inherent characteristics of fibrin as a candidate for hydrogel-based brain tissue regeneration

| Positive findings                                                                                                                                                                                                                                                                                                                                                                                                                                                                                                                                                                                                                                                                                                                                                                                                                                                                                                                              | Negative findings                                                                                                                                                                                                                                                                                   |
|------------------------------------------------------------------------------------------------------------------------------------------------------------------------------------------------------------------------------------------------------------------------------------------------------------------------------------------------------------------------------------------------------------------------------------------------------------------------------------------------------------------------------------------------------------------------------------------------------------------------------------------------------------------------------------------------------------------------------------------------------------------------------------------------------------------------------------------------------------------------------------------------------------------------------------------------|-----------------------------------------------------------------------------------------------------------------------------------------------------------------------------------------------------------------------------------------------------------------------------------------------------|
| <ul style="list-style-type: none"> <li>• easily tunable mechanical properties [113,116,120,121]</li> <li>• porous [121]</li> <li>• biodegradable [15,119,121]</li> <li>• injectable [15,113,122]</li> <li>• bioactive (contains RGD peptide) [119,121]</li> <li>• non-toxic [120]</li> <li>• can be produced from patient’s own blood (non-immunogenic) [113]</li> <li>• advantageous drug delivery platform [116–118,122]</li> <li>• promotes neuronal differentiation and maturation rather than glial differentiation of NSCs <i>in vitro</i> [120]</li> <li>• supports viability and promotes neuronal differentiation and migration of BMSCs <i>in vivo</i> [113]</li> <li>• salmon fibrin is superior to Matrigel in terms of stimulating neurite growth of cortical and spinal neurons <i>in vitro</i> [106]</li> <li>• Tisseel fibrin gel is superior to PEG in terms of NPC neuronal differentiation <i>in vitro</i> [159]</li> </ul> | <ul style="list-style-type: none"> <li>• pro-inflammatory [114,115]</li> <li>• requires modifications for proper neuron-glial differentiation of ES-NPCs <i>in vitro</i> [118]</li> <li>• inferior to collagen type I in terms of DRG neurite outgrowth stimulation <i>in vitro</i> [53]</li> </ul> |

*RGD* – a cell-adhesive tripeptide (arginine-glycine-aspartate); *DRG* – dorsal root ganglion

**Table S8.** Inherent characteristics of gellan gum as a candidate for hydrogel-based brain tissue regeneration

| <b>Positive findings</b>                                                                                                                                                                                      | <b>Negative findings</b>                                                                                                                                                                                                                                                                                                                                     |
|---------------------------------------------------------------------------------------------------------------------------------------------------------------------------------------------------------------|--------------------------------------------------------------------------------------------------------------------------------------------------------------------------------------------------------------------------------------------------------------------------------------------------------------------------------------------------------------|
| <ul style="list-style-type: none"><li>• non-toxic [16,129]</li><li>• resistant to acid stress [16]</li><li>• injectable [124,126]</li><li>• <i>in situ</i> gelling [124]</li><li>• porous [127,129]</li></ul> | <ul style="list-style-type: none"><li>• promotes oligodendrocytal differentiation of NS/PCs <i>in vitro</i> [126]</li><li>• aggregates NS/PCs [126]</li><li>• requires purification from divalent cations prior to injection [127,128]</li><li>• requires modifications to support cell viability, differentiation and neurite outgrowth [127–129]</li></ul> |



**Table S9.** Inherent characteristics of self-assembling peptides and proteins as candidates for hydrogel-based brain tissue regeneration

| Positive findings                                                                                                                                                                                                                                                                                                                                                                                                                                                                                                                                                                                                                                                                                                                                                                                                                                                                                                                                                                                                                                                                                                                                                                                                                                                                                                                                                                                                                                                                                                                                                                                                                                                                                                                                                                                                                                                                                          | Negative findings                                                                                                                                                                                                                                                                                                                                                                                                                                                                                                                                                                                                                            |
|------------------------------------------------------------------------------------------------------------------------------------------------------------------------------------------------------------------------------------------------------------------------------------------------------------------------------------------------------------------------------------------------------------------------------------------------------------------------------------------------------------------------------------------------------------------------------------------------------------------------------------------------------------------------------------------------------------------------------------------------------------------------------------------------------------------------------------------------------------------------------------------------------------------------------------------------------------------------------------------------------------------------------------------------------------------------------------------------------------------------------------------------------------------------------------------------------------------------------------------------------------------------------------------------------------------------------------------------------------------------------------------------------------------------------------------------------------------------------------------------------------------------------------------------------------------------------------------------------------------------------------------------------------------------------------------------------------------------------------------------------------------------------------------------------------------------------------------------------------------------------------------------------------|----------------------------------------------------------------------------------------------------------------------------------------------------------------------------------------------------------------------------------------------------------------------------------------------------------------------------------------------------------------------------------------------------------------------------------------------------------------------------------------------------------------------------------------------------------------------------------------------------------------------------------------------|
| <ul style="list-style-type: none"> <li>• biocompatible at working concentration [61,137,143]</li> <li>• biodegradable [130,149]</li> <li>• non-immunogenic [61]</li> <li>• RADA16-I is porous [137,139,143]</li> <li>• RADA16-I is injectable and self-healing [104,148,149]</li> <li>• RADA16-I supports NSC migration and differentiation into neurons and astrocytes <i>in vitro</i> [108]</li> <li>• Keratin-based hydrogels support NS/PC survival <i>in vitro</i> [136]</li> <li>• RADA16-I is an advantageous and easy-tunable drug-delivery system <i>in vitro</i> [137,138]</li> <li>• RADA16-I supports NSC viability <i>in vitro</i> [143] and <i>in vivo</i> [149]</li> <li>• RADA16-I is mechanically tunable [143]</li> <li>• RADA16-I improves viability, differentiation, morphological and functional maturation of ES-NPCs [129]</li> <li>• keratin-based hydrogels are highly porous [147]</li> <li>• keratins contain internal RGD motifs [147]</li> <li>• K<sub>x</sub>L<sub>y</sub>, R<sub>x</sub>L<sub>y</sub> and E<sub>x</sub>L<sub>y</sub> are easily injectable, porous, cause minimal gliosis and inflammation, exhibit no evident toxicity to neurons and induce vascularization <i>in vivo</i> [130]</li> <li>• RADA16-I readily integrates with host tissue and reduces micro- and astrogliosis <i>in vivo</i> [104,148]</li> <li>• RADA16-I is superior to Matrigel in terms of NSC survival and differentiation <i>in vitro</i> [108] (though neglected by [109])</li> <li>• RADA16-I is superior to Matrigel in terms of NSC viability <i>in vitro</i> [61]</li> <li>• elastin-like proteins support DRG viability <i>in vitro</i> [146]</li> <li>• human keratin promotes neurite growth and vascularization of peripheral nerves <i>in vivo</i> [147]</li> <li>• RADA16-I promotes neurite outgrowth and supports survival of iPS-NPCs <i>in vivo</i> [104]</li> </ul> | <ul style="list-style-type: none"> <li>• RADA16-I is toxic to human NSCs at concentrations above 1% [108]</li> <li>• keratins are slowly degradable [147]</li> <li>• K<sub>x</sub>L<sub>y</sub>, R<sub>x</sub>L<sub>y</sub> and E<sub>x</sub>L<sub>y</sub> support limited ingrowth of nerve fibers and neuron-supportive astroglia [130]</li> <li>• RADA16-I does not promote migration of neurons and oligodendrocytes and does not prevent host cells from apoptosis [148]</li> <li>• RADA16-I is inferior to growth factor-reduced Matrigel in terms of viability, migration, and maturation of ES-NPCs <i>in vitro</i> [109]</li> </ul> |

*K<sub>x</sub>L<sub>y</sub>, R<sub>x</sub>L<sub>y</sub>, and E<sub>x</sub>L<sub>y</sub> – diblock copolypeptide hydrogels including combinations of lysine and leucine (K<sub>x</sub>L<sub>y</sub>), arginine and leucine (R<sub>x</sub>L<sub>y</sub>), and glutamate and leucine (E<sub>x</sub>L<sub>y</sub>)*

**Table S10.** Inherent characteristics of PEG as a candidate for hydrogel-based brain tissue regeneration

| Positive findings                                                                                                                                                                                                                                                                                                                                                                                                                                                                                                                                                                                                                                                                                                                                                                                                                  | Negative findings                                                                                                                                                                                                                                                                                                                                                                                                                                                             |
|------------------------------------------------------------------------------------------------------------------------------------------------------------------------------------------------------------------------------------------------------------------------------------------------------------------------------------------------------------------------------------------------------------------------------------------------------------------------------------------------------------------------------------------------------------------------------------------------------------------------------------------------------------------------------------------------------------------------------------------------------------------------------------------------------------------------------------|-------------------------------------------------------------------------------------------------------------------------------------------------------------------------------------------------------------------------------------------------------------------------------------------------------------------------------------------------------------------------------------------------------------------------------------------------------------------------------|
| <ul style="list-style-type: none"> <li>• highly hydrophilic [158]</li> <li>• supports neurite extension at low concentrations (PC12 and DRG cells) <i>in vitro</i> [157,160]</li> <li>• 4-arm PEG-cross-linked PLL hydrogels are biodegradable and promote viability, proliferation, and neuronal differentiation of NPCs and NSCs <i>in vitro</i> [153,154]</li> <li>• PEG-RADA16-I composite supports DRG neurite outgrowth <i>in vitro</i> [161]</li> <li>• IGF-1 gradient in PEG-PLGA system directs axonal growth <i>in vitro</i> [163]</li> <li>• PLA-b-PEG-b-PLA-based hydrogels attenuate glial response <i>in vivo</i> [165,166]</li> <li>• PEG-Si is thixotropic (shear-thinning and self-healing) [162]</li> <li>• a PLA-b-PEG-b-PLA triblock-derived hydrogel is biocompatible and minimally-swelling [166]</li> </ul> | <ul style="list-style-type: none"> <li>• poorly porous [156,159]</li> <li>• non-degradable [152,157–159,162,164,165]</li> <li>• bioinert [160]</li> <li>• photo-encapsulation of primary neurons induces apoptosis [120]</li> <li>• poorly supports neuronal differentiation of NPCs <i>in vitro</i> [159]</li> <li>• requires modifications to support cell viability and proliferation [152,158]</li> <li>• PEG-Si increases glial response <i>in vivo</i> [162]</li> </ul> |

*PC12* – rat pheochromocytoma cells; *PLL* – poly-L-lysine; *IGF-1* – insulin-like growth factor 1; *PLA-b-PEG-b-PLA* – triblock polymer built of poly(lactic acid) and poly(ethylene glycol); *PEG-Si* – a thixotropic PEG-based hydrogel with dispersed silica nanoparticles

**Table S11.** Inherent characteristics of MA- and MAA-based polymers as candidates for hydrogel-based tissue regeneration

| Positive findings                                                                                                                                                                                                                                                                                                                                                                                                                                                                                                                                                                                                                                                                                                                                                                                                                                                                                                                                                           | Negative findings                                                                                                                                                                                                                                                                                                                                                                                                               |
|-----------------------------------------------------------------------------------------------------------------------------------------------------------------------------------------------------------------------------------------------------------------------------------------------------------------------------------------------------------------------------------------------------------------------------------------------------------------------------------------------------------------------------------------------------------------------------------------------------------------------------------------------------------------------------------------------------------------------------------------------------------------------------------------------------------------------------------------------------------------------------------------------------------------------------------------------------------------------------|---------------------------------------------------------------------------------------------------------------------------------------------------------------------------------------------------------------------------------------------------------------------------------------------------------------------------------------------------------------------------------------------------------------------------------|
| <ul style="list-style-type: none"> <li>• pHPMA is highly porous [167]</li> <li>• pHEMA can be modified to tune drug release kinetics <i>in vitro</i> [168]</li> <li>• sialic acid-modified pHPMA is highly biocompatible, stimulates vascularization, host cell migration, their neuronal differentiation, TH-positive fiber growth, and prevents gliosis <i>in vivo</i> [167]</li> <li>• pHEMA integrates with host spinal cord, stimulates neurofilament growth and attenuates glial response <i>in vivo</i> [171]</li> <li>• pHPMA-RGD stimulates axonal growth and neuronal migration <i>in vivo</i> [172,174]</li> <li>• pHEMA attenuates astrogliotic response and inhibits the synthesis of neuroinhibitory CSPG <i>in vivo</i> [175]</li> <li>• PLA-b-pHEMA is non-toxic to spinal motoneurons and allows neurite outgrowth <i>in vitro</i> [170]</li> <li>• PLA-b-pHEMA stimulates axonal growth and prevents glial scar formation <i>in vivo</i> [170]</li> </ul> | <ul style="list-style-type: none"> <li>• pHEMA and pHPMA are non-degradable [12,16,167,170,175]</li> <li>• pHEMA is stiff [168]</li> <li>• pHPMA is swelling [167]</li> <li>• pHPMA does not prevent glial scarring <i>in vivo</i> [172]</li> <li>• pHPMA and pHEMA induce microglial infiltration <i>in vivo</i> [174,175]</li> <li>• PLA-b-pHEMA induces microglial and macrophageal response <i>in vivo</i> [170]</li> </ul> |

*pHPMA* – poly(*N*-[2-hydroxypropyl] methacrylamide); *pHEMA* – poly(2-hydroxyethyl methacrylate); *PLA-b-pHEMA* – a block copolymer hydrogel built of poly(lactic acid) and poly(2-hydroxyethyl methacrylate); *TH* – tyrosine hydroxylase (the key dopamine synthesis enzyme)
